# Supplementary material
Source: PubMed Central journal article supplement (PMC3894722)
Supplement: cn400185r_si_001.pdf [file cn400185r_si_001.pdf]

Wavelength-selective one- and two-photon uncaging of GABA.

*Supporting Information*

Joseph M. Amatrudo<sup>1</sup>, Jeremy P. Olson<sup>1</sup>, G. Lur<sup>2</sup>, Chiayu Q. Chiu<sup>2</sup>, Michael J. Higley<sup>2</sup>, and Graham C.R. Ellis-Davies<sup>1\*</sup>.

<sup>1</sup>Department of Neuroscience, Mount Sinai School of Medicine, New York, NY 10029, USA.

<sup>2</sup>Department of Neurobiology and Program in Cellular Neuroscience, Neurodegeneration and Repair, Yale School of Medicine, New Haven, CT 06510. USA.

\*correspondence: [graham.davies@mssm.edu](mailto:graham.davies@mssm.edu).

**(E)-di-tert-Butyl 2-(3-(4-(((4-((tert-butoxycarbonyl)amino)butanoyl)oxy)methyl)-7-(diethylamino)-2-oxo-2H-chromen-3-yl)acrylamido) succinate:**

A solution of (E)-di-tert-butyl 2-(3-(7-(diethylamino)-4-(hydroxymethyl)-2-oxo-2H-chromen-3-yl) acrylamido) succinate (**2**) (130 mg, 0.239 mmol, 1 eq) in dichloromethane (15 mL) was treated with Boc-L-aminobutyric acid (73 mg, 0.358 mmol, 1.5 eq), then 1-ethyl-3-(3-dimethylaminopropyl) carbodiimide (288 mg, 1.49 mmol, 6.25 eq) and cat. dimethylaminopyridine (15 mg). The reaction was stirred for 16 hours, then poured into water and extracted into ethyl acetate. The combined organics were dried over MgSO<sub>4</sub>, filtered and concentrated to obtain the crude product. The crude material was then purified by column chromatography (silica, 1:1 Hexanes: Ethyl Acetate) to obtain the desired compound in 84% yield (147 mg, 0.201 mmol) as a yellow solid. <sup>1</sup>H NMR (300 MHz, CDCl<sub>3</sub>) δ: 7.78 (d, 1H, J = 15.0 Hz), 7.52 (d, 1H, J = 9.3 Hz), 7.31 (d, 1H, J = 15.0 Hz), 6.68 (d, 1H, J = 8.1 Hz), 6.64 (dd, 1H, J = 2.1 Hz, 9.0 Hz), 6.47 (d, 1H, J = 2.7 Hz), 5.39 (s, 2H), 4.99 (bs, 1H), 4.82 (m, 1H), 3.44 (q, 4H, J = 7.2 Hz), 3.14 (m, 1H), 2.85 (dq, 2H, J = 50.1 Hz, 17.1 Hz, 4.5 Hz), 2.38 (t, 2H, J = 7.2 Hz), 1.83 (t, 2H, J = 7.2 Hz), 1.46 (s, 27H), 1.23 (t, 6H, J = 7.0 Hz); <sup>13</sup>C NMR (75 MHz, CDCl<sub>3</sub>) δ: 172.7, 170.4, 169.9, 166.2, 160.3, 155.8, 151.4, 146.9, 132.6, 131.1, 128.9, 126.8, 125.0, 115.0, 109.8, 108.2, 97.5, 82.6, 81.8, 68.5, 57.9, 49.7, 45.2, 40.1, 37.9, 31.6, 28.8, 28.5, 28.3, 25.6, 12.9 ; LCMS (ESI) m/z calc'd for C<sub>38</sub>H<sub>55</sub>N<sub>3</sub>O<sub>11</sub>[M+H]<sup>+</sup> 730.6137, found 730.6149.

**(E)-di-tert-butyl 2-(3-(4-(((4-aminobutanoyl)oxy)methyl)-7-(diethylamino)-2-oxo-2H-chromen-3-yl)acrylamido)succinate (**1**):** (E)-di-tert-butyl 2-(3-(4-(((4-aminobutanoyl)oxy)methyl)-7-(diethylamino)-2-oxo-2H-chromen-3-yl)acrylamido) succinate (110 mg, 0.151 mmol) was dissolved in dichloromethane (2 mL), and trifluoroacetic acid (6 mL) and stirred for 2.5 hours. The solvent was then removed and the crude material was redissolved in dichloromethane and concentrated to obtain the crude product. The crude product was purified by reverse phase HPLC (35% CH<sub>3</sub>CN/ 0.1% TFA in H<sub>2</sub>O, Alltima C18 column) then

lyophilized to obtain (**1**) in 50% yield as a white powder.  $^1\text{H}$  NMR (600 MHz,  $\text{CD}_3\text{OD}$ )  $\delta$ : 7.71 (m, 2H), 7.31 (d, 1H,  $J = 12.5$  Hz), 6.79 (m, 1H), 6.54 (d, 1H,  $J = 2.4$  Hz), 5.49 (s, 2H), 3.52 (q, 4H,  $J = 7.2$  Hz), 3.00-2.85 (m, 4H), 2.53 (t, 2H,  $J = 7.2$  Hz), 1.95 (m, 2H), 1.22 (t, 6H,  $J = 7.2$  Hz);  $^{13}\text{C}$  NMR (75 MHz,  $\text{CD}_3\text{OD}$ )  $\delta$ : 172.5, 171.9, 167.8, 160.6, 155.7, 151.8, 147.9, 132.5, 126.8, 123.8, 113.4, 109.8, 107.6, 96.4, 57.6, 44.4, 38.6, 30.1, 22.3, 11.3; LCMS (ESI)  $m/z$  calc'd for  $\text{C}_{25}\text{H}_{31}\text{N}_3\text{O}_9$   $[\text{M}+\text{H}]^+$  518.2133, found 518.2135.

**(E)-N-(20-azido-3,6,9,12,15,18-hexaoxaicosyl)-3-(4-(((tert-butyl)dimethylsilyl)oxy)methyl)-7-(diethylamino)-2-oxo-2H-chromen-3-yl)acrylamide (4):** A solution of O-(Aminoethyl)-2-azidoethylpentaethyleneglycol (180 mg, 0.514 mmol, 2 eq) and (E)-3-(4-(((tert-butyl)dimethylsilyl)oxy)methyl)-7-(diethylamino)-2-oxo-2H-chromen-3-yl)acrylic acid (**2**) (111 mg, 0.257 mmol, 1 eq) in acetonitrile (12 mL) was treated with 1-ethyl-3-(3-dimethylaminopropyl) carbodiimide (99 mg, 0.514 mmol, 2 eq). The reaction was stirred for 16 hours, and then concentrated to obtain the crude product. The crude material was then purified by column chromatography (silica, 9:1 Dichloromethane: Methanol) to obtain (**4**) in 89% yield (176 mg, 0.229 mmol).  $^1\text{H}$  NMR (300 MHz,  $\text{CDCl}_3$ )  $\delta$ : 7.84 (d, 1H,  $J = 14.7$  Hz), 7.69 (d, 1H,  $J = 9.3$  Hz), 7.23 (d, 1H,  $J = 15.3$  Hz), 6.61 (dd, 1H,  $J = 9.3$  Hz, 2.4 Hz), 6.45 (d, 1H,  $J = 2.4$  Hz), 6.37 (s, 1H), 4.96 (s, 2H), 3.66-3.36 (m, 36H), 1.22 (t, 6H,  $J = 7.0$  Hz), 0.895 (s, 9H), 0.17 (s, 6H);  $^{13}\text{C}$  NMR (75 MHz,  $\text{CDCl}_3$ )  $\delta$ : 166.5, 160.6, 155.5, 151.3, 150.7, 131.7, 127.5, 124.8, 109.1, 108.3, 96.9, 70.6, 70.5, 70.4, 70.0, 69.9, 57.5, 50.7, 44.8, 39.5, 25.9, 18.3, 12.6, 12.5, -5.0; LCMS (ESI)  $m/z$  calc'd for  $\text{C}_{37}\text{H}_{62}\text{N}_5\text{O}_{10}\text{Si}$   $[\text{M}+\text{H}]^+$  764.4266, found 764.4274.

**(E)-N-(20-azido-3,6,9,12,15,18-hexaoxaicosyl)-3-(7-(diethylamino)-4-(hydroxymethyl)-2-oxo-2H-chromen-3-yl)acrylamide (5):** (E)-N-(20-azido-3,6,9,12, 15,18-hexaoxaicosyl)-3-(4-(((tert-butyl)dimethylsilyl)oxy)methyl)-7-(diethylamino)-2-oxo-2H-chromen-3-yl)acrylamide (**4**) (0.166 g, 0.209 mmol, 1

eq) was dissolved in tetrahydrofuran (15 mL) was added tetrabutylammonium fluoride (1M in THF) (0.313 mL, 0.313 mmol, 1.5 eq). The reaction was stirred for 2 hours, then quenched with sat. NH<sub>4</sub>Cl and extracted into ethyl acetate. The combined organics were dried over MgSO<sub>4</sub>, filtered and concentrated to obtain the crude product. The crude material was then purified by column chromatography (silica, 9:1 Dichloromethane: Methanol) to obtain (**5**) in 84% yield (114 mg, 0.176 mmol) as a yellow solid. <sup>1</sup>H NMR (300 MHz, CDCl<sub>3</sub>) δ: 7.81 (d, 1H, J = 15.3 Hz), 7.71 (d, 1H, J = 9.3 Hz), 7.22 (d, 1H, J = 15.3 Hz), 6.71 (s, 1H), 6.62 (dd, 1H, J = 9.3 Hz, 2.7 Hz), 6.45 (d, 1H, J = 2.7 Hz), 4.95 (s, 2H), 3.66-3.36 (m, 40H), 1.21 (t, 6H, J = 7.0 Hz); <sup>13</sup>C NMR (75 MHz, CDCl<sub>3</sub>) δ: 167.0, 160.6, 155.6, 151.6, 150.8, 131.9, 127.4, 124.6, 113.2, 109.2, 108.3, 96.9, 70.4, 70.2, 69.9, 69.7, 56.3, 50.6, 44.8, 39.6, 29.7, 12.6; LCMS (ESI) m/z calc'd for C<sub>31</sub>H<sub>47</sub>N<sub>5</sub>O<sub>10</sub> [M+H]<sup>+</sup> 649.3323, found 649.3324.

**(E)-(3-(1-azido-22-oxo-3,6,9,12,15,18-hexaoxa-21-azatetracos-23-en-24-yl)-7-(diethylamino)-2-oxo-2H-chromen-4-yl)methyl 4-((tert-**

**butoxycarbonyl)amino) butanoate:** A solution of (E)-N-(20-azido-3,6,9,12,15,18-hexaoxaicosyl)-3-(7-(diethylamino)-4-(hydroxymethyl)-2-oxo-2H-chromen-3-yl)acrylamide (**5**) (85 mg, 0.130 mmol, 1 eq) in dichloromethane (10 mL) was treated with Boc-L-aminobutyric acid (40 mg, 0.196 mmol, 1.5 eq), then 1-ethyl-3-(3-dimethylaminopropyl) carbodiimide (157 mg, 0.813 mmol, 6.25 eq) and cat. dimethylaminopyridine (2 mg). The reaction was stirred for 16 hours, then poured into water and extracted into ethyl acetate. The combined organics were dried over MgSO<sub>4</sub>, filtered and concentrated to obtain the crude product. The crude material was then purified by column chromatography (silica, 1:1 Hexanes: Ethyl Acetate) to obtain the desired product in 94% yield (102 mg, 0.122 mmol) as a yellow solid. <sup>1</sup>H NMR (300 MHz, CDCl<sub>3</sub>) δ: 7.75 (d, 1H, J = 15.3 Hz), 7.52 (d, 1H, J = 9.3 Hz), 7.28 (d, 1H, J = 14.7 Hz), 6.64 (dd, 1H, J = 2.7 Hz, 9.3 Hz), 6.58 (s, 1H), 6.47 (d, 1H, J = 2.4 Hz), 5.39 (s, 2H), 5.02 (bs, 1H), 3.68-3.59 (m, 38H), 3.12 (m, 2H), 2.39 (t, 2H, J = 7.2 Hz), 1.81 (t, 2H, J = 7.2 Hz), 1.41 (s, 9H), 1.21 (t, 6H, J = 7.0 Hz); <sup>13</sup>C NMR (75 MHz, CDCl<sub>3</sub>) δ: 172.7,

166.7, 160.4, 156.2, 155.7, 151.4, 146.7, 131.8, 126.8, 128.7, 115.2, 109.8, 108.2, 97.5, 70.9, 70.7, 70.3, 70.2, 57.9, 51.0, 45.2, 40.1, 39.9, 31.6, 28.8, 25.6, 12.9; LCMS (ESI) m/z calc'd for C<sub>40</sub>H<sub>62</sub>N<sub>6</sub>O<sub>13</sub> [M+H]<sup>+</sup> 835.4453, found 835.4469.

**(E)-(3-(1-azido-22-oxo-3,6,9,12,15,18-hexaoxa-21-azatetracos-23-en-24-yl)-7-(diethylamino)-2-oxo-2H-chromen-4-yl)methyl 4-aminobutanoate (6):** (E)-(3-(1-azido-22-oxo-3,6,9,12,15,18-hexaoxa-21-azatetracos-23-en-24-yl)-7-(diethylamino)-2-oxo-2H-chromen-4-yl)methyl 4-((*tert*-butoxycarbonyl)amino)butanoate (95 mg, 0.114 mmol) was dissolved in dichloromethane (4 mL), and trifluoroacetic acid (4 mL) and stirred for 2.5 hours. The solvent was then removed and the crude material was redissolved in dichloromethane and concentrated to obtain the crude product. The crude product was purified by reverse phase HPLC (50% CH<sub>3</sub>CN/ 0.1% TFA in H<sub>2</sub>O, Alltima C18 column) then lyophilized to obtain **(6)** in 73% yield as a red oil. <sup>1</sup>H NMR (300 MHz, CD<sub>3</sub>OD) δ: 7.73 (s, 1H), 7.69 (d, 1H, J = 6.0 Hz), 7.29 (d, 1H, J = 15.3 Hz), 6.80 (dd, 1H, J = 2.4 Hz, 9.6 Hz), 6.55 (d, 1H, J = 2.7 Hz), 5.50 (s, 2H), 3.66-3.53 (m, 30H), 3.34 (m, 2H), 3.01 (t, 2H, J = 7.8 Hz), 2.53 (t, 2H, J = 6.9 Hz), 1.95 (m, 2H), 1.23 (t, 6H, J = 6.9 Hz); <sup>13</sup>C NMR (75 MHz, CDCl<sub>3</sub>) δ: 172.0, 168.1, 160.6, 155.7, 151.8, 147.8, 132.1, 127.0, 124.5, 113.7, 110.0, 107.8, 96.7, 70.3, 70.2, 70.1, 69.9, 69.7, 57.9, 50.7, 44.8, 39.5, 39.0, 30.5, 22.8, 11.8; LCMS (ESI) m/z calc'd for C<sub>35</sub>H<sub>54</sub>N<sub>6</sub>O<sub>11</sub> [M+H]<sup>+</sup> 734.3851, found 734.3856.

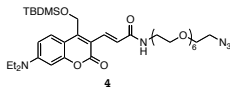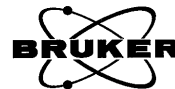

Current Data Parameters  
 NAME JO\_386.1  
 EXPNO 1  
 PROCNO 1

F2 - Acquisition Parameters  
 Date\_ 20130320  
 Time 16.35  
 INSTRUM spect  
 PROBHD 5 mm PABBO BB/  
 PULPROG zg  
 TD 16384  
 SOLVENT CDCl3  
 NS 16  
 DS 4  
 SWH 10000.000 Hz  
 FIDRES 0.610352 Hz  
 AQ 0.8193000 sec  
 RG 32  
 LW 50.000 usec  
 DE 6.00 usec  
 TE 298.0 K  
 D1 1.00000000 sec  
 TD0 1

===== CHANNEL f1 =====  
 NUC1 1H  
 P1 8.00 usec  
 PL1 0.00 dB  
 SFO1 600.1528209 MHz

F2 - Processing parameters  
 SI 16384  
 SF 600.1499973 MHz  
 WDW EM  
 SSB 0  
 LB 0.50 Hz  
 GB 0  
 PC 1.00

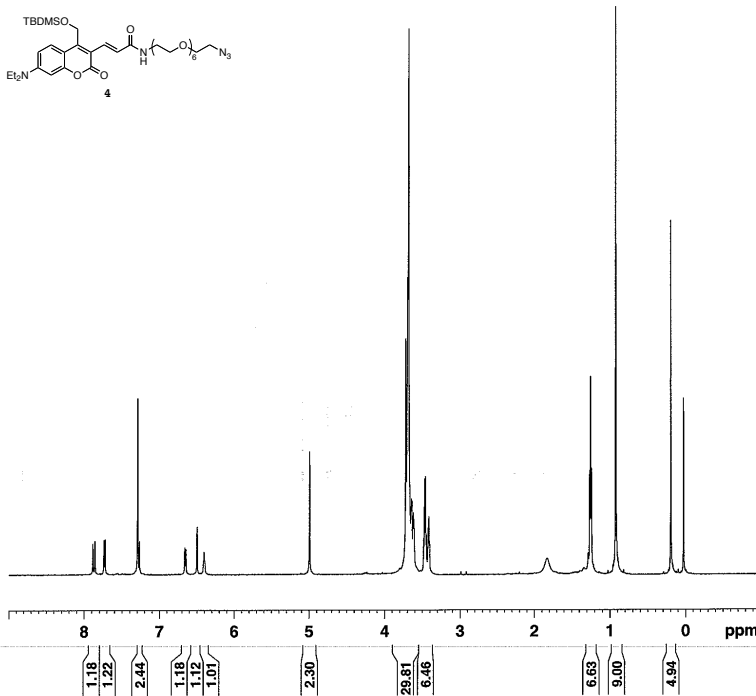

12 Sept 2013 JO 513.1 C13  
 Archive directory: /export/home/calciun/vnmrsys/data  
 Sample directory:  
 Pulse Sequence: s2pul  
 Solvent: CDCl3  
 Temp: 25.0 C / 298.1 K  
 File: JO\_513.1.C13  
 Mercury-300 "GCONMR2"

Relax. delay 1.000 sec  
 Pulse 45.0 degrees  
 Acq. time 1.000 sec  
 Width 18867.8 Hz  
 25000 repetitions  
 OBSERVE C13, 75.4184275 MHz  
 DECOUPLE H1, 299.9352868 MHz  
 Power 39 dB  
 Continuously on  
 MWTZ-16 modulated  
 DATA PROCESSING  
 Line broadening 1.0 Hz  
 FT size 65336  
 Total time 14 hr, 22 min, 12 sec

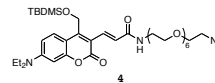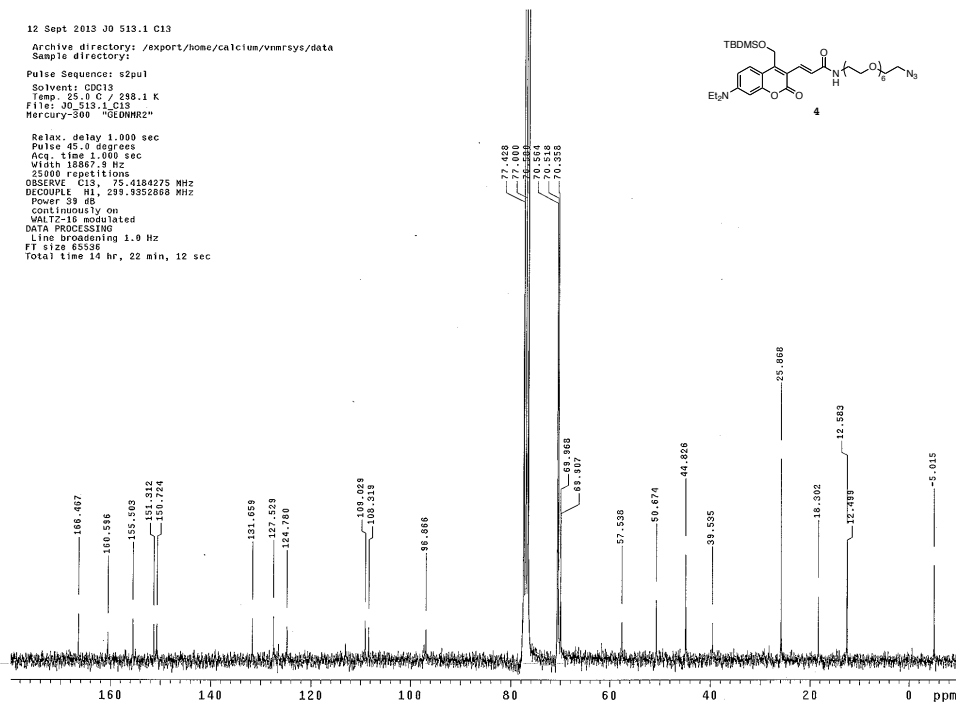

[ Mass Spectrum ]  
 Date : 27-Sep-2013 12:25  
 Data : Sept070  
 Sample: J0 51.3.1  
 Note : NMR  
 Inlet : Direct Ion Mode : FIB+  
 Spectrum Type : Normal Ion [EF-Linear]  
 RT : 0.54 min Scan# : (6,15)  
 BP : m/z 764.3499 Int. : 9.58  
 Output m/z range : 715.0000 to 819.0000 Cut Level : 0.00 %

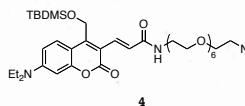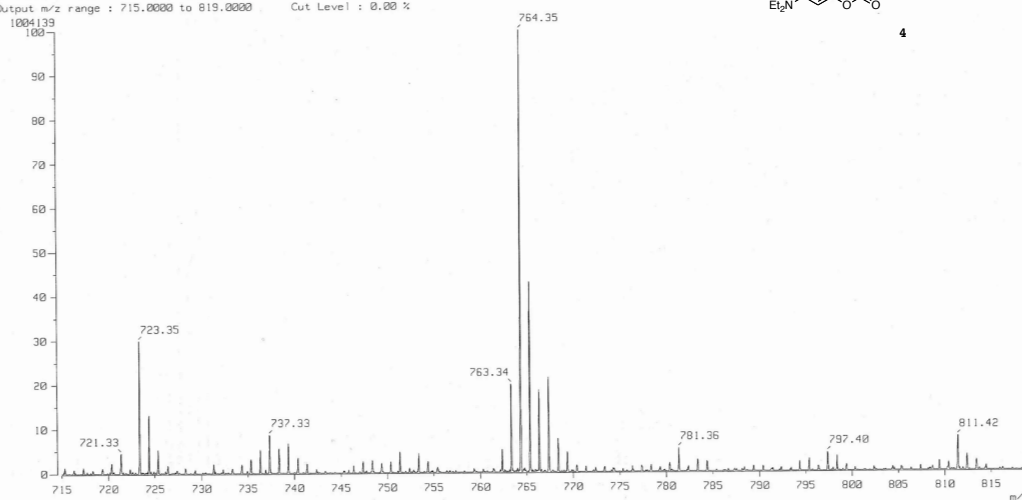

| Observed m/z | Int%  | Err[ppm / mmu] | U.S. Composition           |
|--------------|-------|----------------|----------------------------|
| 764.4274     | 100.0 | +1.1 / +0.8    | 10.5 C 37 H 62 O 10 N 5 Si |

[ Theoretical Ion Distribution ]

Molecular Formula : C<sub>37</sub> H<sub>62</sub> O<sub>10</sub> N<sub>5</sub> Si  
 (m/z 764.4266, MW 765.0123, U.S. 10.5)  
 Base Peak : 764.4266, Averaged MW : 765.0150(a), 765.0159(w)

7 Aug 2013 J0 489.1  
 Archive directory: /export/home/calciua/vnmrsys/data  
 Sample directory:  
 File: PROTON  
 Pulse Sequence: s2pul  
 Solvent: CDCl3  
 Temp. 25.0 C / 298.1 K  
 Mercury-300 "GCONES2"  
 Relax. delay 1.000 sec  
 Pulse 45.0 degrees  
 Acq. time 3.700 sec  
 Width 4798.5 Hz  
 8 repetitions  
 OBSERVE H1 299.9338230 MHz  
 DATA PROCESSING  
 FT size 85536  
 Total time 0 min, 40 sec

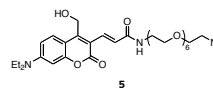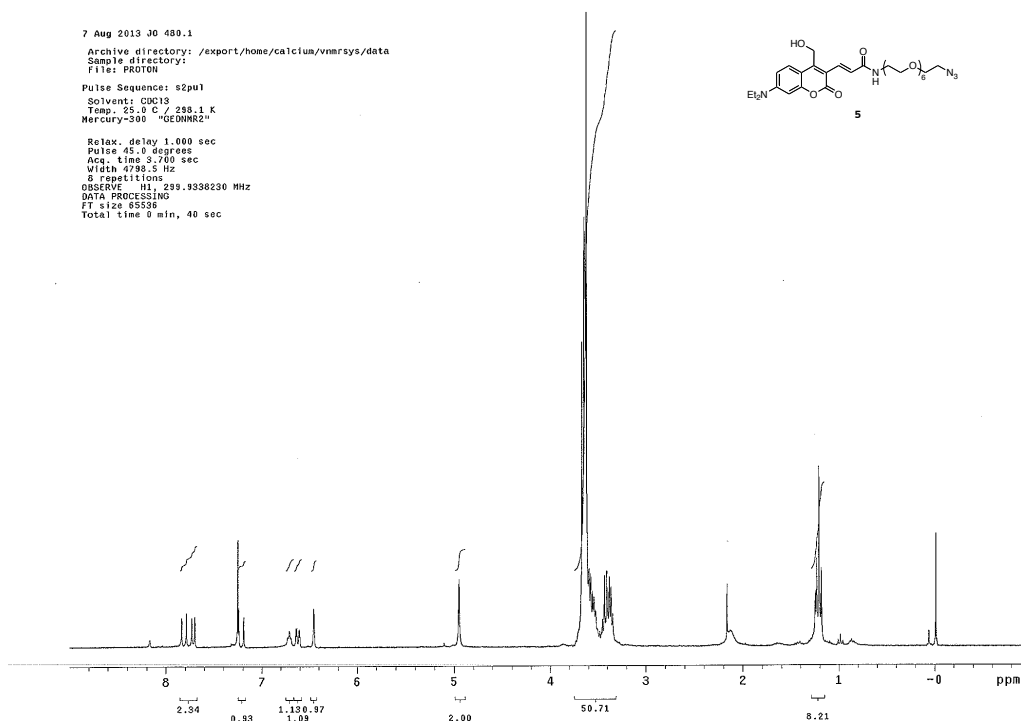

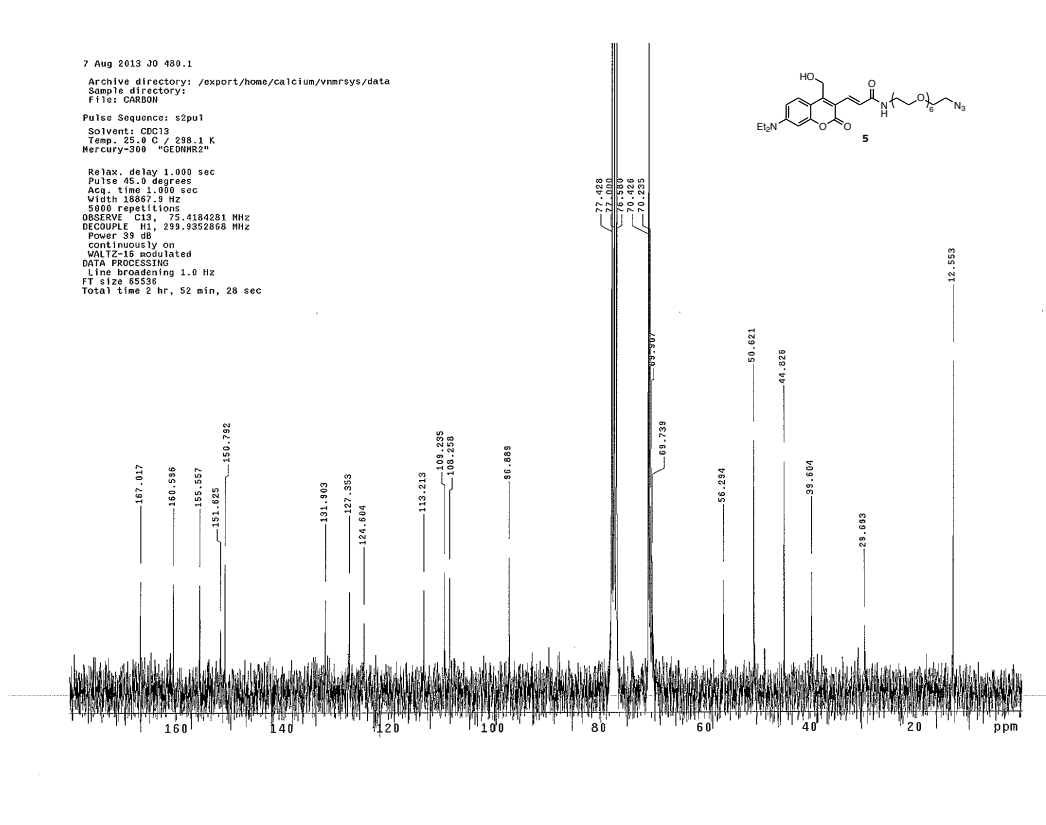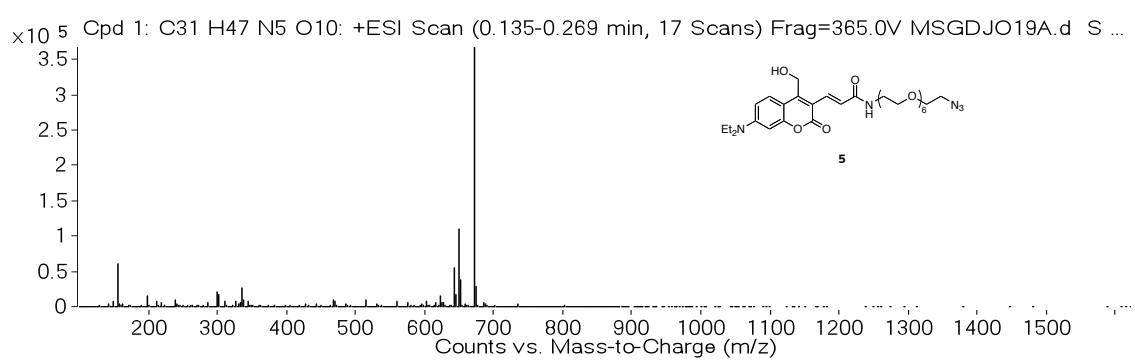

**MS Spectrum Peak List**

| <i>m/z</i> | <i>Calc m/z</i> | <i>Diff(ppm)</i> | <i>z</i> | <i>Abund</i> | <i>Formula</i> | <i>Ion</i>          |
|------------|-----------------|------------------|----------|--------------|----------------|---------------------|
| 650.3395   | 650.3396        | 0.1              | 1        | 110144.84    | C31H47N5O10    | (M+H) <sup>+</sup>  |
| 651.3424   | 651.3427        | 0.43             | 1        | 38751.34     | C31H47N5O10    | (M+H) <sup>+</sup>  |
| 652.3447   | 652.3453        | 0.83             | 1        | 9186.03      | C31H47N5O10    | (M+H) <sup>+</sup>  |
| 653.3462   | 653.3478        | 2.47             | 1        | 1812.08      | C31H47N5O10    | (M+H) <sup>+</sup>  |
| 654.3426   | 654.3504        | 11.81            | 1        | 396.65       | C31H47N5O10    | (M+H) <sup>+</sup>  |
| 672.3218   | 672.3215        | -0.49            | 1        | 367703.44    | C31H47N5O10    | (M+Na) <sup>+</sup> |
| 673.3248   | 673.3246        | -0.25            | 1        | 129113.1     | C31H47N5O10    | (M+Na) <sup>+</sup> |
| 674.3269   | 674.3272        | 0.52             | 1        | 28219.11     | C31H47N5O10    | (M+Na) <sup>+</sup> |
| 675.3286   | 675.3298        | 1.73             | 1        | 5164.59      | C31H47N5O10    | (M+Na) <sup>+</sup> |



|          |          |      |   |        |             |         |
|----------|----------|------|---|--------|-------------|---------|
| 676.3269 | 676.3323 | 7.95 | 1 | 972.07 | C31H47N5O10 | (M+Na)+ |
|----------|----------|------|---|--------|-------------|---------|

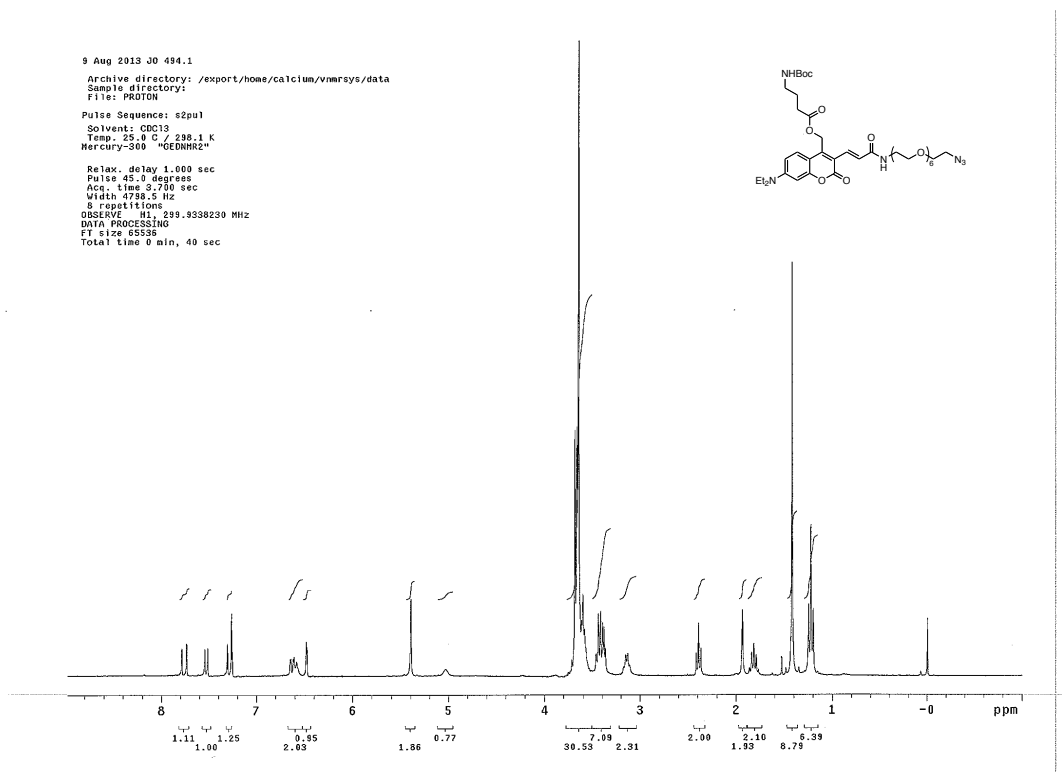

9 Aug 2013 JO 494.1 C13  
 Archive directory: /export/home/calciun/vnarsys/data  
 Sample directory:  
 File: CARBON  
 Pulse Sequence: s2pu1  
 Solvent: CDCl3  
 Temp: 25.0 C / 298.1 K  
 Mercury-300 \*GENMR2\*  
 Relax, delay 1.000 sec  
 Pulse 60.0 degree  
 Acq. time 1.000 sec  
 Width 16867.3 Hz  
 9792 repetitions  
 OBSERVE C13, 75.4104810 MHz  
 DECOUPLE H1, 299.3352888 MHz  
 Power 39 dB  
 continuously on  
 WALTZ-16 modulated  
 DATA PROCESSING  
 Line broadening 1.0 Hz  
 FI size 65536  
 Total time 5 hr, 44 min, 54 sec

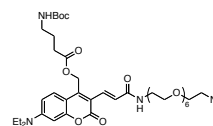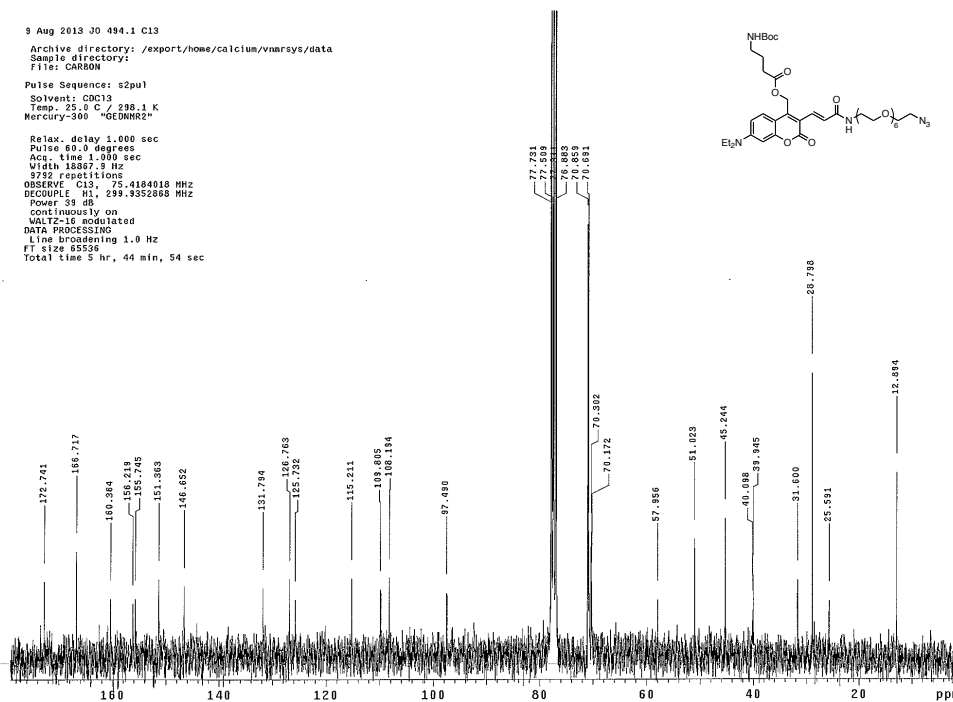

[ Mass Spectrum ]  
 Date : 27-Sep-2013 12:43  
 Data : Sept072  
 Sample: JO 494.1  
 Note : NMR  
 Inlet : Direct Ion Mode : FRB+  
 Spectrum Type : Normal Ion [EF-Linear]  
 RT : 0.24 min Scan# : (2,10)  
 BP : m/z 835.2964 Int. : 4.00  
 Output m/z range : 802.0000 to 863.0000 Cut Level : 0.00 %

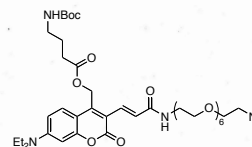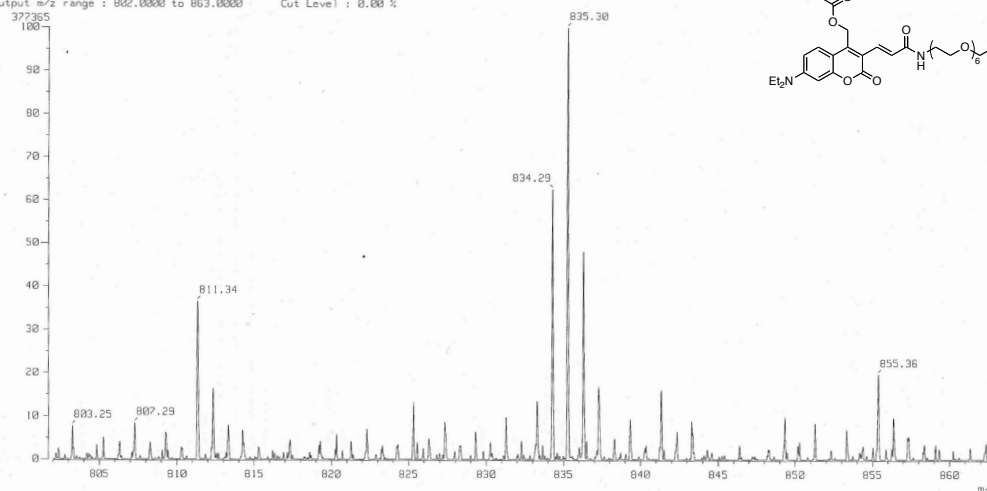

| Observed m/z | Int%  | Err[ppm / mmu] | U.S. | Composition        |
|--------------|-------|----------------|------|--------------------|
| 835.4469     | 100.0 | +1.9 / +1.6    | 12.5 | C 40 H 63 O 13 N 6 |

[ Theoretical Ion Distribution ]  
 Molecular Formula : C40 H63 O13 N6  
 (m/z 835.4453, MW 835.9726, U.S. 12.5)  
 Base Peak : 835.4453, Averaged MW : 835.9753(a), 835.9760(w)

15 Aug 2013 00 496.1  
 Archive directory: /export/home/calciun/vmrcsys/data  
 Sample directory:  
 File: PROTON  
 Pulse Sequence: s2pul  
 Solvent: CD3OD  
 Temp.: 25.0 C / 298.1 K  
 Mercury-300 "GEMMA2"  
 Relax. delay 1.000 sec  
 Pulse 45.0 degrees  
 Acq. time 3.700 sec  
 Width 4798.5 Hz  
 8 repetitions  
 OBSERVE H1, 299.9350047 MHz  
 DATA PROCESSING  
 FT size 65506  
 Total time 0 min, 40 sec

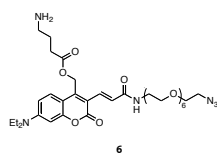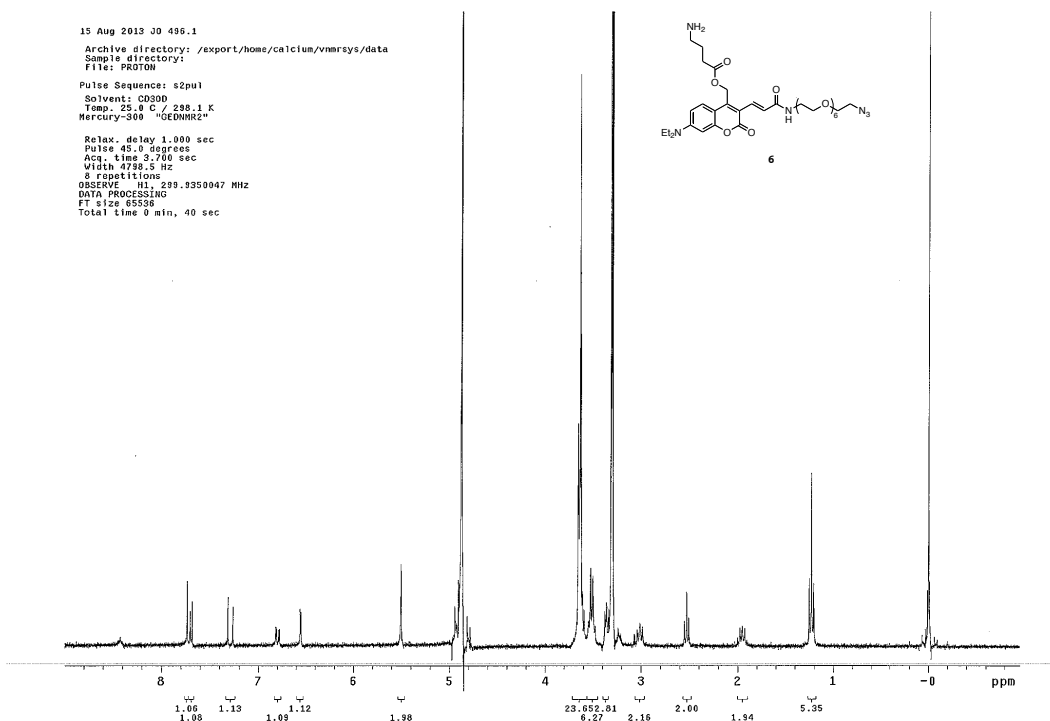

15 Aug 2013 00 496.1 C13  
 Archive directory: /export/home/calciun/vmrcsys/data  
 Sample directory:  
 File: CARBON  
 Pulse Sequence: s2pul  
 Solvent: CD3OD  
 Temp.: 25.0 C / 298.1 K  
 Mercury-300 "GEMMA2"  
 Relax. delay 1.000 sec  
 Pulse 45.0 degrees  
 Acq. time 1.000 sec  
 Width 15897.9 Hz  
 39000 repetitions  
 OBSERVE C13, 75.4186989 MHz  
 DECOUPLE H1, 299.9364685 MHz  
 Power 33 dB  
 continuously on  
 WALTZ-16 modulated  
 DATA PROCESSING  
 Line broadening 1.0 Hz  
 FT size 65536  
 Total time 17 hr, 14 min, 38 sec

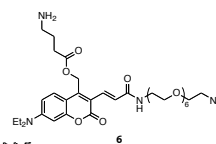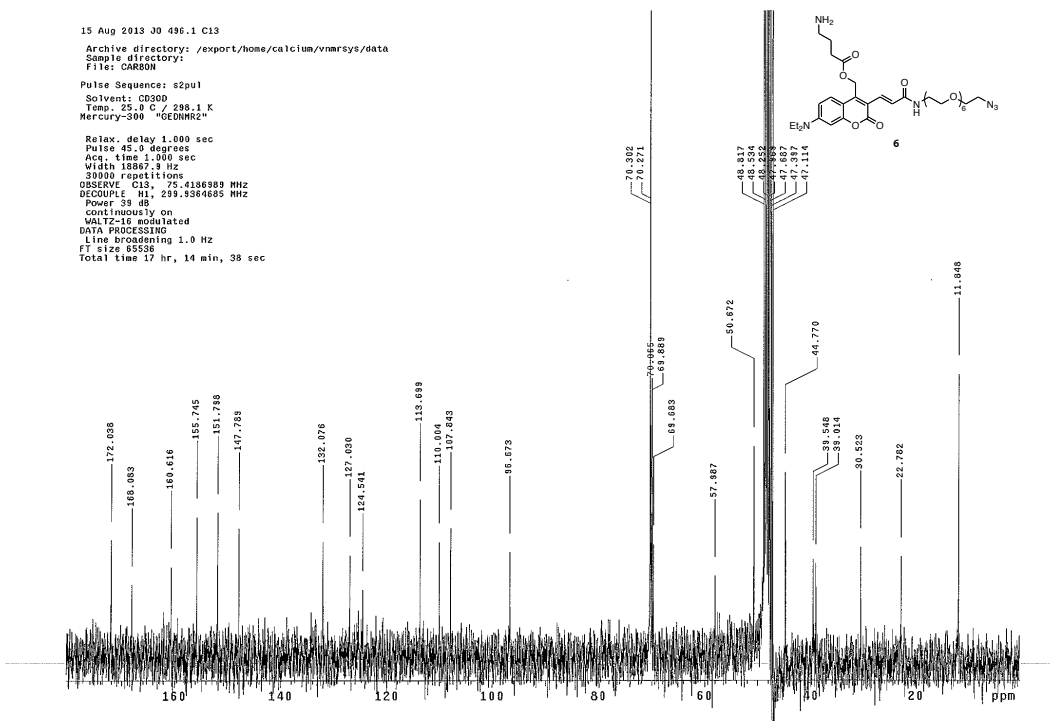

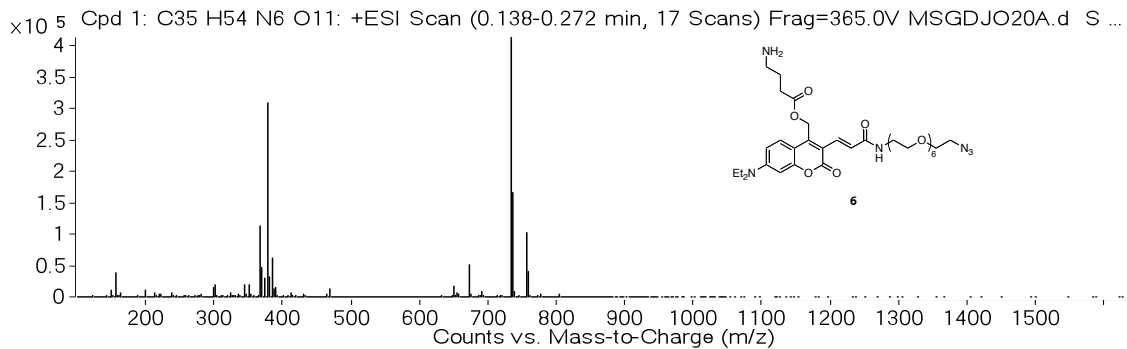

### MS Spectrum Peak List

| <i>m/z</i> | <i>Calc m/z</i> | Diff(ppm) | <i>z</i> | Abund     | Formula                                                        | Ion                   |
|------------|-----------------|-----------|----------|-----------|----------------------------------------------------------------|-----------------------|
| 368.2004   | 368.1998        | -1.69     | 2        | 111862.17 | C <sub>35</sub> H <sub>54</sub> N <sub>6</sub> O <sub>11</sub> | (M+2H) <sup>2+</sup>  |
| 368.7018   | 368.7013        | -1.19     | 2        | 47657.36  | C <sub>35</sub> H <sub>54</sub> N <sub>6</sub> O <sub>11</sub> | (M+2H) <sup>2+</sup>  |
| 369.2035   | 369.2027        | -2.27     | 2        | 12572.82  | C <sub>35</sub> H <sub>54</sub> N <sub>6</sub> O <sub>11</sub> | (M+2H) <sup>2+</sup>  |
| 390.1822   | 390.1817        | -1.23     | 2        | 15188.57  | C <sub>35</sub> H <sub>54</sub> N <sub>6</sub> O <sub>11</sub> | (M+2Na) <sup>2+</sup> |
| 735.3927   | 735.3923        | -0.56     | 1        | 413248.34 | C <sub>35</sub> H <sub>54</sub> N <sub>6</sub> O <sub>11</sub> | (M+H) <sup>+</sup>    |
| 736.3961   | 736.3954        | -0.93     | 1        | 165560.97 | C <sub>35</sub> H <sub>54</sub> N <sub>6</sub> O <sub>11</sub> | (M+H) <sup>+</sup>    |
| 737.3981   | 737.3981        | -0.08     | 1        | 39580.2   | C <sub>35</sub> H <sub>54</sub> N <sub>6</sub> O <sub>11</sub> | (M+H) <sup>+</sup>    |
| 757.3746   | 757.3743        | -0.39     | 1        | 101382.55 | C <sub>35</sub> H <sub>54</sub> N <sub>6</sub> O <sub>11</sub> | (M+Na) <sup>+</sup>   |
| 758.3774   | 758.3773        | -0.02     | 1        | 39481.48  | C <sub>35</sub> H <sub>54</sub> N <sub>6</sub> O <sub>11</sub> | (M+Na) <sup>+</sup>   |
| 759.3799   | 759.38          | 0.17      | 1        | 10039.79  | C <sub>35</sub> H <sub>54</sub> N <sub>6</sub> O <sub>11</sub> | (M+Na) <sup>+</sup>   |

31 May 2012 00 163.1  
 Archive directory: /export/home/calciun/vmrsys/data  
 Sample directory:  
 File: PROTON  
 Pulse Sequence: s2pul  
 Solvent: CDCl3  
 Temp: 25.0 C / 298.1 K  
 Mercury-300 "GEMMR2"  
 Relax. delay 1.000 sec  
 Pulse 45.0 degrees  
 Acq. time 3.700 sec  
 Width 4730.5 Hz  
 8 repetitions  
 OBSERVE H1, 299.940373 MHz  
 DATA PROCESSING  
 FT size 65536  
 Total time 0 min, 40 sec

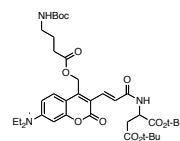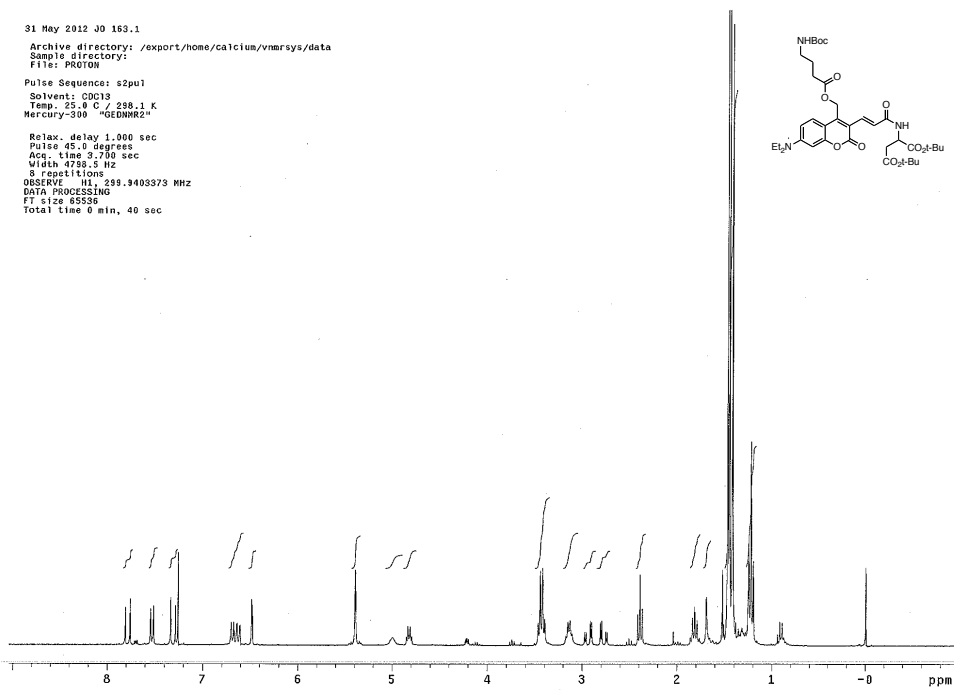

30 May 2012 00 163.1  
 Archive directory: /export/home/calciun/vmrsys/data  
 Sample directory:  
 File: CARBON  
 Pulse Sequence: s2pul  
 Solvent: CDCl3  
 Temp: 25.0 C / 298.1 K  
 Mercury-300 "GEMMR2"  
 Relax. delay 1.000 sec  
 Pulse 45.0 degrees  
 Acq. time 1.000 sec  
 Width 1887.9 Hz  
 10000 repetitions  
 OBSERVE C13, 75.4200393 MHz  
 DECOUPLE H1, 299.9418722 MHz  
 Power 39 dB  
 continuously on  
 WALTZ-16 modulated  
 DATA PROCESSING  
 Line broadening 1.0 Hz  
 FT size 65536  
 Total time 5 hr, 44 min, 54 sec

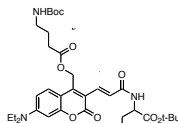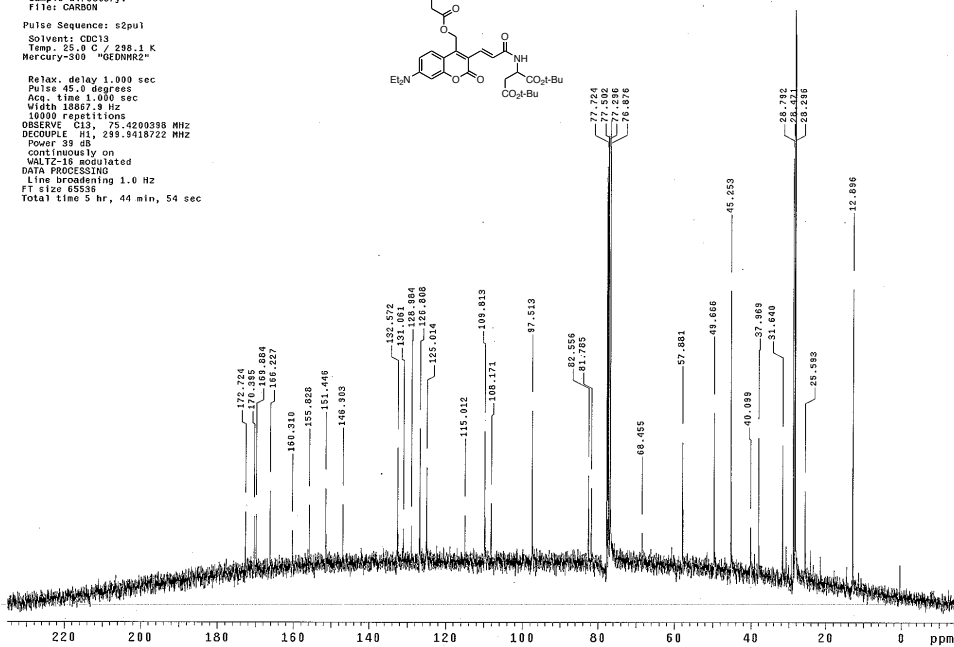

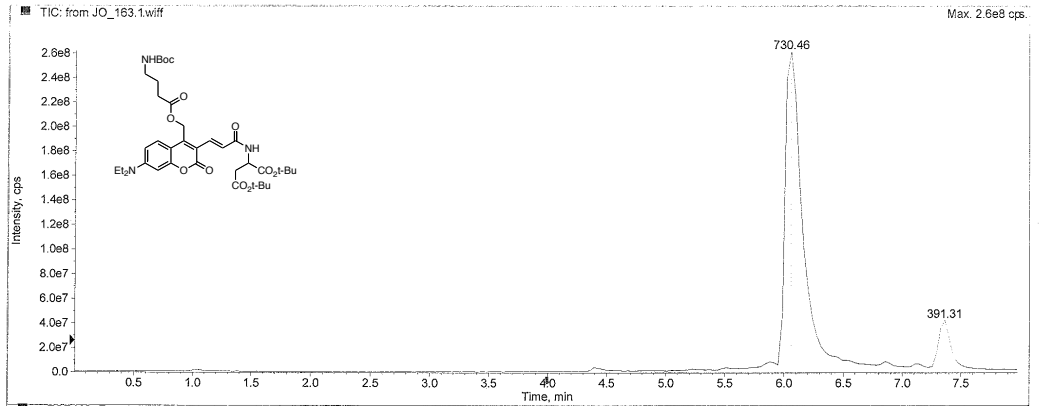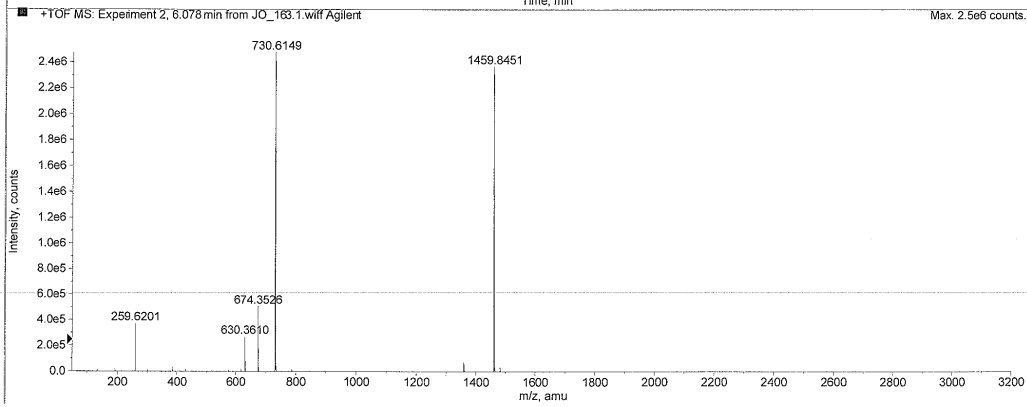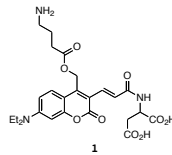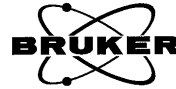

Current Data Parameters  
 NAME JO-170.1  
 EXPNO 14  
 PROCNO 1

F2 - Acquisition Parameters  
 Date\_ 20120703  
 Time 17.22  
 INSTRUM spect  
 PROBHD 5 mm PABBO BB/  
 PULPROG zg  
 TD 16384  
 SOLVENT MeOD  
 NS 16  
 DS 4  
 SWH 10000.000 Hz  
 FIDRES 0.610352 Hz  
 AQ 0.8193000 sec  
 RG 128  
 DW 50.000 usec  
 DE 6.00 usec  
 TE 297.6 K  
 D1 1.0000000 sec  
 TD0 1

===== CHANNEL f1 =====  
 NUC1 1H  
 P1 8.00 usec  
 PL1 0.00 dB  
 SF01 600.1528209 MHz

F2 - Processing parameters  
 SI 16384  
 SF 600.1500153 MHz  
 WHW SW  
 SSB 0  
 LB 0.50 Hz  
 GB 0  
 PC 1.00

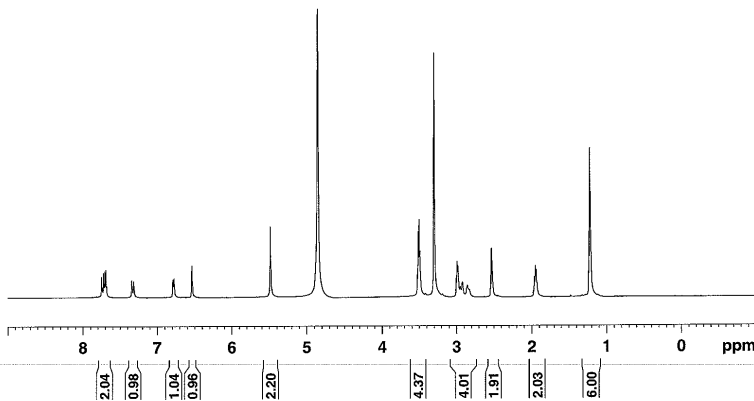

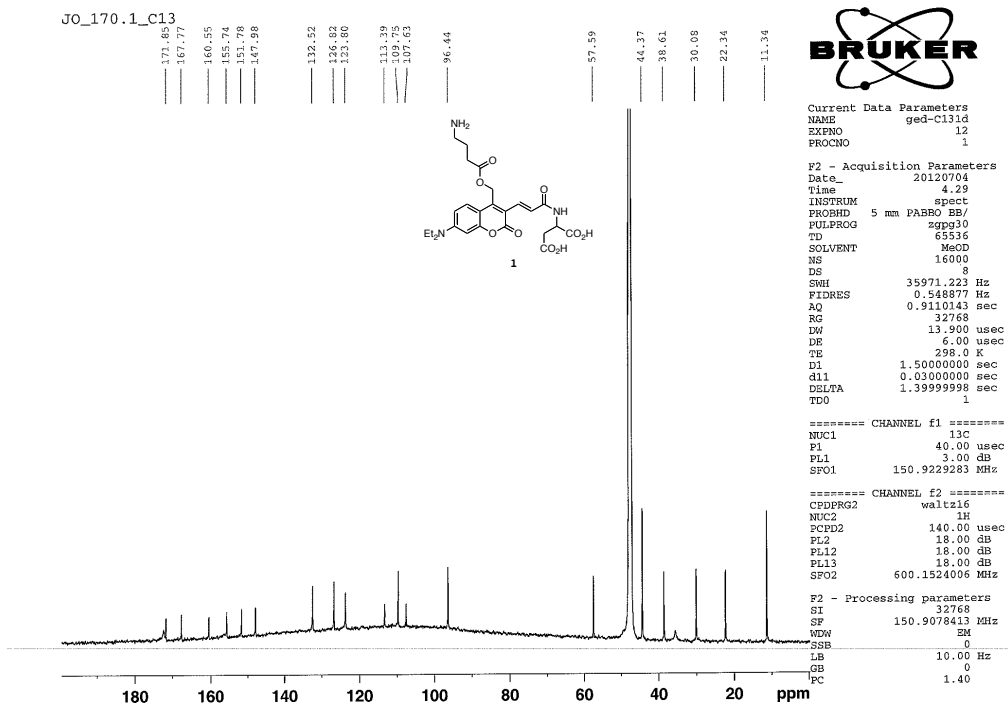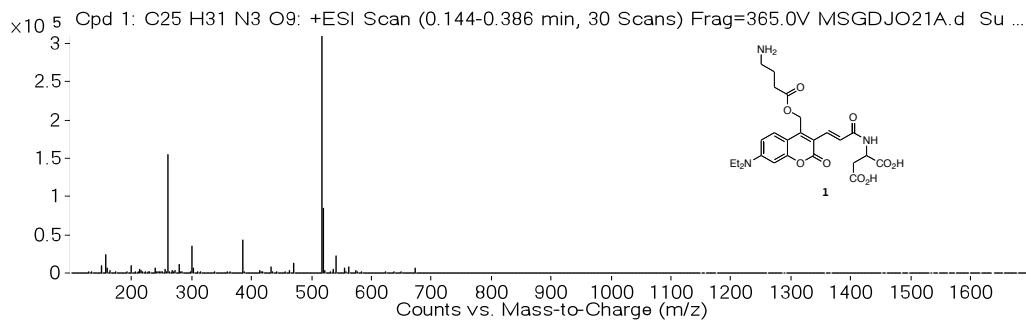

### MS Spectrum Peak List

| <i>m/z</i> | <i>Calc m/z</i> | Diff(ppm) | <i>z</i> | Abund     | Formula                                                       | Ion                               |
|------------|-----------------|-----------|----------|-----------|---------------------------------------------------------------|-----------------------------------|
| 259.6112   | 259.6103        | -3.34     | 2        | 155220.63 | C <sub>25</sub> H <sub>31</sub> N <sub>3</sub> O <sub>9</sub> | (M+2H) <sup>+</sup> 2             |
| 260.1125   | 260.1119        | -2.41     | 2        | 45514.71  | C <sub>25</sub> H <sub>31</sub> N <sub>3</sub> O <sub>9</sub> | (M+2H) <sup>+</sup> 2             |
| 260.6136   | 260.6131        | -1.96     | 2        | 9676.08   | C <sub>25</sub> H <sub>31</sub> N <sub>3</sub> O <sub>9</sub> | (M+2H) <sup>+</sup> 2             |
| 281.592    | 281.5922        | 0.94      | 2        | 235.8     | C <sub>25</sub> H <sub>31</sub> N <sub>3</sub> O <sub>9</sub> | (M+2Na) <sup>+</sup> 2            |
| 518.2135   | 518.2133        | -0.43     | 1        | 309856.53 | C <sub>25</sub> H <sub>31</sub> N <sub>3</sub> O <sub>9</sub> | (M+H) <sup>+</sup>                |
| 519.2166   | 519.2165        | -0.31     | 1        | 85228.64  | C <sub>25</sub> H <sub>31</sub> N <sub>3</sub> O <sub>9</sub> | (M+H) <sup>+</sup>                |
| 520.2189   | 520.219         | 0.22      | 1        | 16953.01  | C <sub>25</sub> H <sub>31</sub> N <sub>3</sub> O <sub>9</sub> | (M+H) <sup>+</sup>                |
| 535.2471   | 535.2399        | -13.61    | 1        | 5511.28   | C <sub>25</sub> H <sub>31</sub> N <sub>3</sub> O <sub>9</sub> | (M+NH <sub>4</sub> ) <sup>+</sup> |
| 540.1948   | 540.1953        | 0.83      | 1        | 22708.83  | C <sub>25</sub> H <sub>31</sub> N <sub>3</sub> O <sub>9</sub> | (M+Na) <sup>+</sup>               |
| 541.1975   | 541.1984        | 1.59      | 1        | 6797.02   | C <sub>25</sub> H <sub>31</sub> N <sub>3</sub> O <sub>9</sub> | (M+Na) <sup>+</sup>               |
